# Supplementary material
Source: PubMed Central journal article supplement (PMC3223611)
Supplement: neo1311_1081SD1.pdf [file neo1311_1081SD1.pdf]

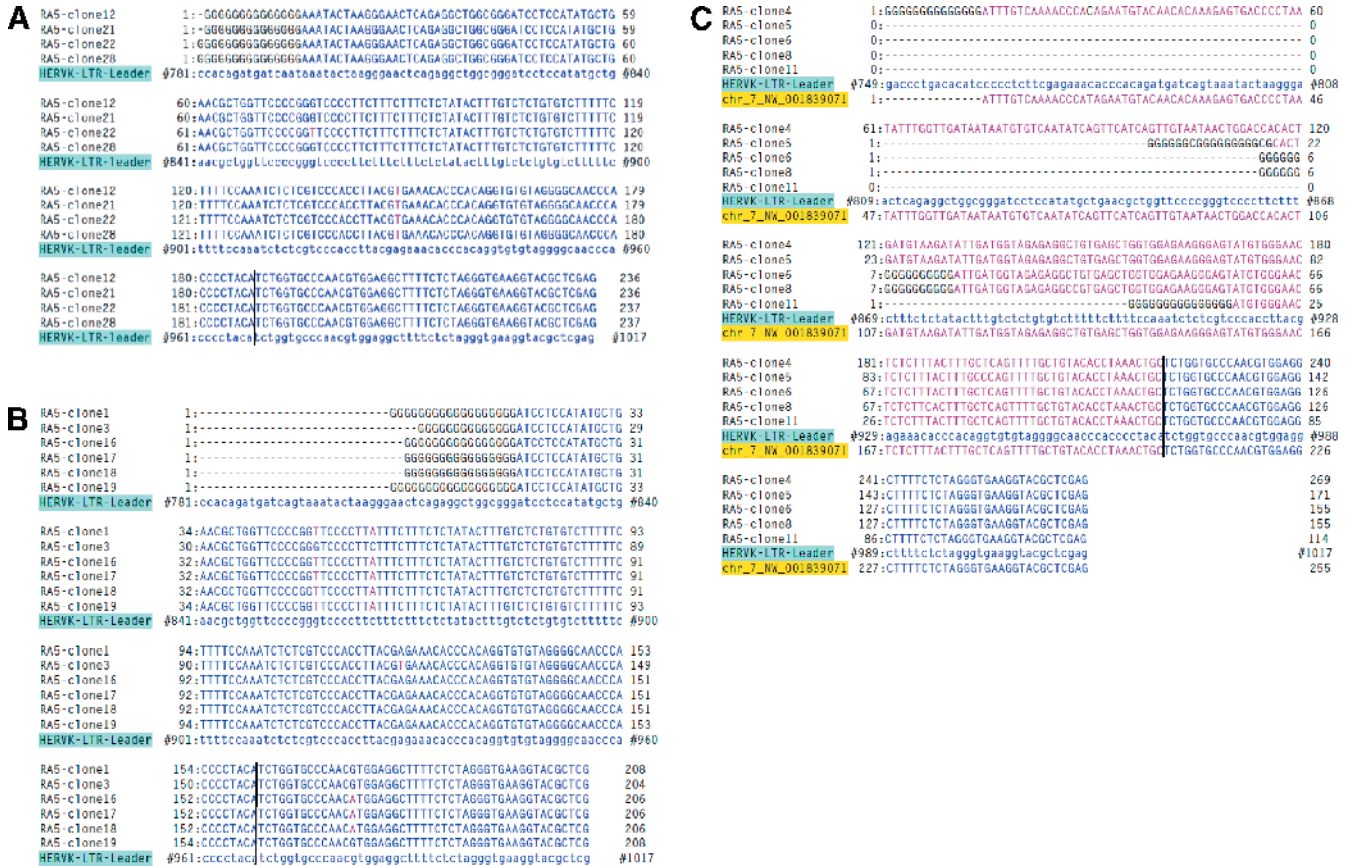

**Figure W1.** Nucleotide sequences of the 5' RACE clones obtained from MeWo cells. (A) Clones indicating transcriptional initiation at nucleotide no. 796 are aligned with the LTR-leader sequences (HERVK-LTR-Leader) of HML-2.HOM (GenBank AF074086.2). Nucleotides identical to the HERVK-LTR-leader sequences are in blue, and mismatches in magenta. The 3' end of the LTR is marked by a line. (B) Clones corresponding to the transcripts starting at no. 826 are shown. The first 6 clones of 11 are shown. (C) Alignment of the 5' RACE products indicating transcriptional initiation by a non-LTR promoter at 7q22. Corresponding chromosomal sequences (NW\_001839071) are also aligned. Regions unrelated to HERV-K are in magenta.



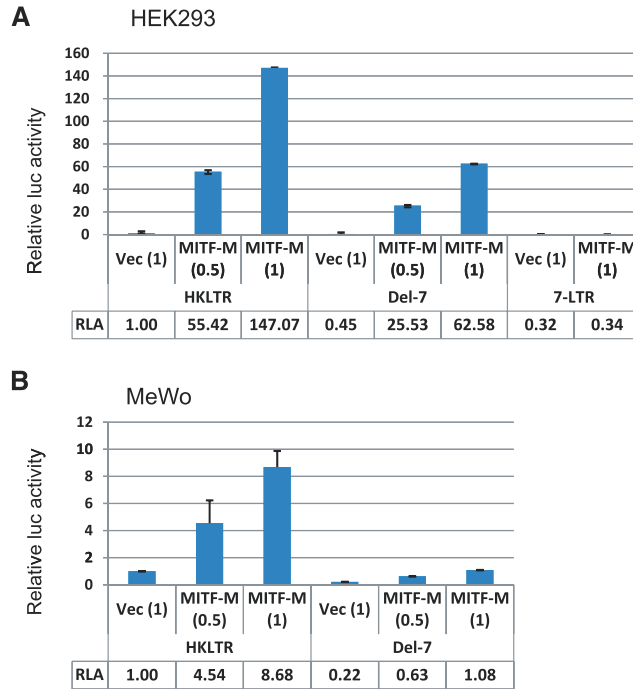

**Figure W3.** Transactivation of HERV-K LTR by MITF-M. Luc expression assay with HKLTR-1, Del-7, and 7-LTR in combination with the MITF-M expression vector. Relative luciferase activity (RLA) (mean  $\pm$  SD) is presented in relation to the control assay (1.00) with HKLTR-1 and the empty vector (Vec). The ratio (0.5, 1) of the activator plasmid amount to the Luc plasmid amount is given in parentheses. Experiments were performed two times in triplicate.

**Table W1.** Human Genomic LTRs with Less Than 95% Sequence Identity to the HERV-K LTR (HML-2.HOM).

| Chromosome | Genomic Contig   | Position | Inr460  | MITF-3 | MITF-2 | MITF-1 | 793TATA  | Inr826  | Identity (≥95%) | Gaps        | Score (bits) |
|------------|------------------|----------|---------|--------|--------|--------|----------|---------|-----------------|-------------|--------------|
| 7          | Template HKLTR-1 | #1       | GGAATGC | CACATG | CTTGTG | CACATC | AATAAATA | GGATCCT |                 |             |              |
| 7          | NT_079592.2      | 4636386  | GGAATGC | CACATG | CTTGTG | CACATC | AATAAATA | GGATCCT | 944/945 (99%)   | 1/945 (0%)  | 1696         |
|            |                  | 4627883  | GGAATGC | CACATG | CTTGTG | CACATC | AGTAAATA | GGATCCT | 942/945 (99%)   | 1/945 (0%)  | 1687         |
|            |                  | 4619379  | GGAATGC | CACATG | CTTGTG | CACATC | AATAAATA | GGATCCT | 938/945 (99%)   | 1/945 (0%)  | 1669         |
|            |                  | 16240452 | GGAATGC | CACGTG | CTTGTG | CACATC | AATAAATA | GGATCCT | 934/945 (98%)   | 1/945 (0%)  | 1651         |
|            |                  | 23081303 | GGAATGC | CACGTG | CTTGTG | CACATC | AATAAATA | GGATCCT | 933/945 (98%)   | 1/945 (0%)  | 1647         |
| 12         | NT_029419.11     | 20865515 | GGAATGC | CACATG | CTTGTG | CACATC | AATAAATA | GGATCCT | 936/945 (99%)   | 1/945 (0%)  | 1660         |
|            |                  | 20874004 | GGAATGT | CACATG | CTTGTG | CACATC | AATAAATA | GGATCCT | 932/945 (98%)   | 1/945 (0%)  | 1642         |
|            |                  | 13992344 | GGAATGT | CACGTG | CTTGTG | CACATC | AATAAATA | GGCTCCT | 929/945 (98%)   | 1/945 (0%)  | 1629         |
|            |                  | 17870521 | GGAATGT | CACGTG | CTTGTG | CACATC | AATAAATA | GGATCCT | 929/946 (98%)   | 1/945 (0%)  | 1622         |
|            |                  | 18938415 | GGAATGT | CACGTG | CTTGTG | CACATC | AATAAATA | GGATCCT | 925/945 (97%)   | 1/945 (0%)  | 1609         |
| 7          | NT_007741.13     | 2904345  | GGAATGC | CACATG | CTTGTG | CACATC | AATAAATA | GGATCCT | 944/945 (99%)   | 1/945 (0%)  | 1660         |
| 7          | NT_079596.2      | 57285861 | GGAATGC | CACGTG | CTTGTG | CACATC | AATAAATA | GGATCCT | 935/945 (98%)   | 1/945 (0%)  | 1656         |
|            |                  | 24287145 | GGAATGC | CACGTG | CTTGTG | CACATC | AATAAATA | GGATCCT | 930/945 (98%)   | 1/945 (0%)  | 1633         |
|            |                  | 22844882 | GGAATGC | CACGTG | CTTGTG | CACATC | AATAAATA | GGATCCT | 929/945 (98%)   | 1/945 (0%)  | 1629         |
|            |                  | 25232346 | GGAATGC | CACGTG | CTTGTG | CACATC | AATAAATA | GGATCCT | 926/946 (97%)   | 2/946 (0%)  | 1609         |
|            |                  | 3784161  | GGAATGC | CACGTG | CTTGTG | CACATC | AATAAATA | GGATCCT | 921/946 (97%)   | 3/946 (0%)  | 1582         |
|            |                  | 188057   | GGAATGC | CACGTG | CTTGTG | CACATC | AATAAATA | GGATCCT | 906/946 (95%)   | 2/946 (0%)  | 1519         |
|            |                  | 12386954 | GGCATGC | CACGTG | CTTGTG | CACATC | AATAAATA | GGATCCT | 906/946 (95%)   | 11/946 (1%) | 1517         |
| 8          | NT_007995.14     | 7372243  | GGAATGC | CACGTG | CTTGTG | CACATC | AATAAATA | GGATCCT | 934/945 (98%)   | 1/945 (0%)  | 1651         |
|            |                  | 13916038 | GGAATGC | CACGTG | CTTGTG | CACATC | AATAAATA | GGATCCT | 912/945 (96%)   | 1/945 (0%)  | 1552         |
|            |                  | 12972195 | GGCATGC | CACGTG | CTTGTG | CACATC | AATAAATA | GGATCCT | 903/947 (95%)   | 3/947 (0%)  | 1499         |
| Y          | NT_011903.12     | 1088725  | GGAATGC | CACGTG | CTTGTG | CACATC | AATAAATA | GGATCCT | 934/945 (98%)   | 1/945 (0%)  | 1651         |
|            |                  | 2722474  | GGAATGC | CACGTG | CTTGTG | CACATC | AATAAATA | GGATCCT | 934/945 (98%)   | 1/945 (0%)  | 1651         |
|            |                  | 3337067  | GGAATGC | CACGTG | CTTGTG | CACATC | AATAAATA | GGATCCT | 934/945 (98%)   | 1/945 (0%)  | 1651         |
| 19         | NT_011109.15     | 10625035 | GGAATGC | CACGTG | CTTGTG | CACATC | AATAAATA | GGATCCT | 934/945 (98%)   | 1/945 (0%)  | 1651         |
|            |                  | 17365636 | GGAATGC | CACGTG | CTTGTG | CACATC | AATAAATA | GGATCCT | 926/945 (97%)   | 1/945 (0%)  | 1615         |
|            |                  | 10090511 | GGAATGC | CACGTG | CTTGTG | CACATC | AATAAATA | GGATCCT | 931/959 (97%)   | 15/959 (1%) | 1608         |
|            |                  | 397710   | GGAATGC | CACGTG | CTTGTG | CACATC | AATAAATA | GGATCCT | 930/972 (95%)   | 28/972 (2%) | 1581         |
|            |                  | 24814575 | GGCATGC | CACGTG | CTTGTG | CACATC | AATAAATA | GGATCCT | 914/946 (96%)   | 2/946 (0%)  | 1555         |
|            |                  | 10390031 | GGAATGC | CACGTG | CTTGTG | CATATC | AATAAATA | AGATCCT | 909/945 (96%)   | 7/945 (0%)  | 1539         |
|            |                  | 21661083 | GGAATGC | CACGTG | CTTGTG | CACATC | AATAAATA | GGATCCT | 905/945 (95%)   | 6/945 (0%)  | 1521         |
|            |                  | 1449405  | GGCATGC | CACGTG | CTTGTG | CACATC | AATAAATA | AGATCCT | 904/946 (95%)   | 2/946 (0%)  | 1510         |
|            |                  | 24680600 | GGCATGC | CACGTG | CTTGTG | CACATC | AATAAATA | GGATCCT | 902/945 (95%)   | 3/945 (0%)  | 1499         |
| 10         | NT_008705.15     | 9157724  | GGAATGC | CACGTG | CTTGTG | CACATC | AATAAATA | GGATCCT | 933/945 (98%)   | 1/945 (0%)  | 1647         |
| 16         | NT_037887.4      | 5745357  | GGAATGC | CACGTG | CTTGTG | CACATC | AATAAATA | GGATCCT | 933/945 (98%)   | 1/945 (0%)  | 1647         |
|            |                  | 8169731  | GGAATGC | CACGTG | CTTGTG | CACATC | AATAAATA | GGATCCT | 925/945 (97%)   | 1/945 (0%)  | 1611         |
| 8          | NT_008183.18     | 6798560  | GGAATGC | CACGTG | CTTGTG | CACATC | AATAAATA | GGATCCT | 933/945 (98%)   | 1/945 (0%)  | 1647         |
|            |                  | 9966476  | GGAATGC | CACGTG | CTTGTG | CACATC | AATAAATA | GGATCCT | 911/945 (96%)   | 11/945 (1%) | 1543         |
| 4          | NT_006216.14     | 1502918  | GGAATGC | CACGTG | CTTGTG | CACATC | AATAAATA | GGATCCT | 933/945 (98%)   | 1/945 (0%)  | 1647         |
|            |                  | 6812371  | GGAATGC | CACGTG | CTTGTG | CACATC | AATAAATA | GGATCCT | 933/945 (98%)   | 1/945 (0%)  | 1647         |
|            |                  | 9985448  | GGAATGC | CACGTG | CTTGTG | CACATC | AATAAATA | GGATCCT | 911/945 (96%)   | 11/945 (1%) | 1543         |
| 16         | NT_010498.15     | 28448457 | GGAATGC | CACGTG | CTTGTG | CACATC | AATAAATA | GGATCCT | 932/945 (98%)   | 1/945 (0%)  | 1642         |
|            |                  | 1512569  | GGAATGC | CACGTG | CTTGTG | CACATC | AATAAATA | GGATCCT | 928/945 (98%)   | 1/945 (0%)  | 1624         |
| 1          | NT_004487.18     | 6639369  | GGAATGC | CACGTG | CTTGTG | CACATC | AATAAATA | GGATCCT | 932/945 (98%)   | 1/945 (0%)  | 1642         |

Table W1. (continued).

|    |              |          |         |        |        |        |          |         |                  |                |      |
|----|--------------|----------|---------|--------|--------|--------|----------|---------|------------------|----------------|------|
|    |              | 6087779  | GGAATGC | CACGTG | CITGTG | CACATC | AATAAATA | GGATCCT | 930/945<br>(98%) | 1/945<br>(0%)  | 1633 |
|    |              | 6095991  | GGAATGC | CACGTG | CITGTG | CACATC | AATAAATA | GGATCCT | 930/945<br>(98%) | 1/945<br>(0%)  | 1633 |
|    |              | 6060651  | GGAATGC | CACGTG | CITGTG | CACATC | AATAAATA | GGATCCT | 906/946<br>(95%) | 2/946<br>(0%)  | 1519 |
|    |              | 10227941 | GGAATGC | CACGTG | CITGTG | CACATC | AATAAATA | AGATCCT | 903/945<br>(95%) | 1/945<br>(0%)  | 1512 |
| 2  | NT_022184.14 | 6498779  | GGAATGC | CACGTG | CITGTG | CACATC | AATAAATA | GGATCCT | 932/945<br>(98%) | 1/945<br>(0%)  | 1642 |
|    |              | 16268394 | GGAATGC | CACGTG | CITGTG | CACATC | AATAAATA | GGATCCT | 931/945<br>(98%) | 1/945<br>(0%)  | 1638 |
|    |              | 9653238  | GGAATGC | CACATG | CITGTG | CACATC | AATAAATA | GGATCCT | 930/945<br>(98%) | 1/945<br>(0%)  | 1633 |
|    |              | 65304362 | GGCATGC | CACGTG | GGCATG | CACATC | AATAAATA | GGATCCT | 899/946<br>(95%) | 2/946<br>(0%)  | 1487 |
| X  | NT_011786.15 | 9124856  | GGAATGC | CACGTG | CITGTG | CACATC | AATAAATA | GGATCCT | 931/945<br>(98%) | 1/945<br>(0%)  | 1638 |
| 4  | NT_016354.18 | 86128085 | GGAATGC | CACGTG | CITGTG | CACATC | AATAAATA | GGATCCT | 931/945<br>(98%) | 1/945<br>(0%)  | 1638 |
|    |              | 44812799 | GGAATGC | CACGTG | CITGTG | CACATC | AATAAATA | GGATCCT | 929/945<br>(98%) | 3/945<br>(0%)  | 1626 |
| 11 | NT_033899.7  | 5136708  | GGAATGC | CACGTG | CITGTG | CACATC | AATAAATA | GGATCCT | 931/945<br>(98%) | 1/945<br>(0%)  | 1626 |
|    |              | 5128210  | GGAATGC | CACGTG | CITGTG | CACATC | AATAAATA | GGATCCT | 929/945<br>(98%) | 12/945<br>(1%) | 1629 |
|    |              | 22163299 | GGCATGC | CACGTG | CITGTG | CACATC | AATAAATA | GGATCCT | 909/946<br>(96%) | 3/946<br>(0%)  | 1528 |
|    |              | 22155106 | GGCATGC | CACGTG | CITGTG | CACATC | AATAAATA | GGATCCT | 908/946<br>(95%) | 4/946<br>(0%)  | 1521 |
| 8  | NT_023736.16 | 7343774  | GGAATGC | CACGTG | CITGTG | CACATC | AATAAATA | GGATCCT | 931/945<br>(98%) | 1/945<br>(0%)  | 1638 |
|    |              | 7352269  | GGAATGC | CACGTG | CITGTG | CACATC | AATAAATA | GGATCCT | 923/945<br>(97%) | 9/945<br>(0%)  | 1604 |
| 3  | NT_029928.12 | 275097   | GGAATGC | CACGTG | CITGTG | CACATC | AATAAATA | GGATCCT | 931/945<br>(98%) | 1/945<br>(0%)  | 1638 |
| 3  | NT_022517.17 | 47241028 | GGAATGC | CACGTG | CITGTG | CACATC | AATAAATA | GGATCCT | 930/945<br>(98%) | 1/945<br>(0%)  | 1633 |
|    |              | 14073653 | GGAATGC | CACGTG | CITGTG | CACATC | AATAAATA | GGATCCT | 928/945<br>(98%) | 1/945<br>(0%)  | 1624 |
|    |              | 53952548 | GGAATGC | CACATG | CITGTG | CACATC | AATAAATA | GGATCCT | 919/945<br>(97%) | 1/945<br>(0%)  | 1584 |
|    |              | 50497327 | GGAATGC | CACGTG | CITGTG | CACATC | CATAAATA | GGATCCT | 909/945<br>(96%) | 12/945<br>(1%) | 1535 |
|    |              | 23527120 | GGAATGC | CACGTG | CITGTG | CACATC | AATAAATA | GGATCCT | 900/946<br>(95%) | 8/946<br>(0%)  | 1489 |
| 7  | NT_007933.14 | 50045767 | GGAATGC | CACGTG | CITGTG | CACATC | AATAAATA | GGATCCT | 930/945<br>(98%) | 1/945<br>(0%)  | 1633 |
|    |              | 48604326 | GGAATGC | CACGTG | CITGTG | CACATC | AATAAATA | GGATCCT | 928/945<br>(98%) | 1/945<br>(0%)  | 1624 |
|    |              | 50991790 | GGAATGC | CACGTG | CITGTG | CACATC | AATAAATA | GGATCCT | 926/945<br>(97%) | 1/945<br>(0%)  | 1615 |
|    |              | 29571945 | GGAATGC | CACGTG | CITGTG | CACATC | AATAAATA | GGATCCT | 923/945<br>(97%) | 2/945<br>(0%)  | 1599 |
|    |              | 25977162 | GGCATGC | CACGTG | CITGTG | CACATC | AATAAATA | GGATCCT | 906/946<br>(95%) | 2/945<br>(0%)  | 1519 |
|    |              | 38166108 | GGCATGC | CACGTG | CITGTG | CACATC | AATAAATA | GGATCCT | 906/946<br>(95%) | 11/946<br>(1%) | 1517 |
| 17 | NT_010799.14 | 3765019  | GGAATGC | CACGTG | CITGTG | CACATC | AATAAATA | GGATCCT | 930/945<br>(98%) | 1/945<br>(0%)  | 1633 |
|    |              | 9204418  | GGCATGC | CACATG | CITGTG | CACATC | AATAAATA | GGATCCT | 913/949<br>(96%) | 5/949<br>(0%)  | 1544 |
| 9  | NT_008470.18 | 31512589 | GGAATGC | CACGTG | CITGTG | CACATC | AATAAATA | GGATCCT | 930/945<br>(98%) | 1/945<br>(0%)  | 1633 |
|    |              | 18678098 | GGAATGT | CACGTG | CITGTG | CACATC | AATAAATA | GGATCCT | 919/945<br>(97%) | 9/945<br>(0%)  | 1586 |
| 6  | NT_007299.12 | 26911478 | GGAATGC | CACGTG | CITGTG | CACATC | AATAAATA | GGATCCT | 930/945<br>(98%) | 1/945<br>(0%)  | 1633 |
|    |              | 17388676 | GGAATGC | CACGTG | CITGTG | CACATC | AATAAATA | GGATCCT | 927/943<br>(98%) | 1/943<br>(0%)  | 1626 |
|    |              | 16256254 | GGAATGC | CACATG | CITGTG | CACATC | AATAAATA | GGATCCT | 925/945<br>(97%) | 9/945<br>(0%)  | 1613 |
|    |              | 16247792 | GGAATGC | CACGTG | CITGTG | CACATC | AATAAATA | GGATCCT | 924/945<br>(97%) | 9/945<br>(0%)  | 1609 |
|    |              | 31703257 | GGAATGC | CACGTG | CITGTG | CACATC | AATAAATA | GGATCCT | 920/944<br>(97%) | 3/944<br>(0%)  | 1588 |
| 20 | NT_011362.9  | 5652451  | GGAATGC | CACGTG | CITGTG | CACATC | AATAAATA | GGATCCT | 930/945<br>(98%) | 1/945<br>(0%)  | 1633 |
| 12 | NT_009775.16 | 1577352  | GGAATGC | CACGTG | CITGTG | CACATC | AATAAATA | GGATCCT | 929/945<br>(98%) | 1/945<br>(0%)  | 1629 |
|    |              | 9113298  | GGCATGC | CACGTG | CITGTG | CACATC | AATAAATA | GGATCCT | 909/946<br>(96%) | 11/946<br>(1%) | 1532 |
| 14 | NT_026437.11 | 46446026 | GGAATGC | CACGTG | CITGTG | CACATC | AATAAATA | GGATCCT | 929/945<br>(98%) | 1/945<br>(0%)  | 1629 |
|    |              | 36491018 | GGAATGC | CACGTG | CITGTG | CACATC | AATAAATA | GGATCCT | 910/945<br>(96%) | 15/945<br>(1%) | 1522 |
|    |              | 59261730 | GGCATGC | CACGTG | CITGTG | CACATC | AATAAATA | GGATCCT | 902/946<br>(95%) | 10/946<br>(1%) | 1503 |
|    |              | 19587055 | GGCATGC | CACGTG | CITGTG | CACATC | AGTAAATA | GGATCCT | 902/946<br>(95%) | 2/946<br>(0%)  | 1501 |
|    |              | 4194701  | GGCATGC | CACGTG | CITGTG | CACATC | AATAAATA | GGATCCT | 900/945<br>(95%) | 1/945<br>(0%)  | 1498 |
| 3  | NT_005612.15 | 91776453 | GGCATGC | CACGTG | CITGTG | CACATC | AATAAATA | GGATCCT | 929/945<br>(98%) | 1/945<br>(0%)  | 1629 |
|    |              | 91784665 | GGCATGC | CACGTG | CITGTG | CACATC | AATAAATA | GGATCCT | 928/945<br>(98%) | 1/945<br>(0%)  | 1624 |
|    |              | 19239229 | GGAATGC | CACGTG | CITGTG | CACATC | AATAAATA | GGATCCT | 927/945<br>(98%) | 9/945<br>(0%)  | 1622 |



Table W1. (continued).

|   |              |          |         |        |        |        |          |         |                  |                |      |
|---|--------------|----------|---------|--------|--------|--------|----------|---------|------------------|----------------|------|
|   |              | 19247428 | GGAATGC | CACGTG | CITGTG | CACATC | AATAAATA | GGATCCT | 927/945<br>(98%) | 9/945<br>(0%)  | 1622 |
|   |              | 82119455 | GGCATGC | CACATG | CITGTG | CACATC | AATAAATA | GGATCCT | 915/945<br>(96%) | 1/945<br>(0%)  | 1566 |
|   |              | 93106159 | GGCATGC | CACGTG | CITGTG | CACATC | AATAAATA | GGATCCT | 910/945<br>(96%) | 2/945<br>(0%)  | 1539 |
|   |              | 93100773 | GGCATGC | CACGTG | CITGTG | CACATC | AATAAATA | GGATCCT | 905/946<br>(95%) | 10/946<br>(1%) | 1517 |
|   |              | 7918791  | GGCATGC | CACGTG | CITGTG | CACATC | AATAAATA | GGATCCT | 904/946<br>(95%) | 2/946<br>(0%)  | 1510 |
|   |              | 7914037  | GGCATGC | CACGTG | CITGTG | CACATC | AATAAATA | GGATCCT | 903/947<br>(95%) | 4/947<br>(0%)  | 1496 |
| 1 | NT_004559.13 | 729687   | GGAATGC | CACGTG | CITGTG | CACATC | AATAAATA | GGATCCT | 929/945<br>(98%) | 1/945<br>(0%)  | 1629 |
|   |              | 4259163  | GGCATGC | CACGTG | CITGTG | CACATC | AATAAATA | GGATCCT | 901/946<br>(95%) | 2/946<br>(0%)  | 1496 |
| 1 | NT_032977.8  | 45814690 | GGAATGC | CACGTG | CITGTG | CACATC | AATAAATA | GGATCCT | 929/945<br>(98%) | 1/945<br>(0%)  | 1629 |
|   |              | 45820095 | GGAATGC | CACGTG | CITGTG | CACATC | AATAAATA | GGATCCT | 929/945<br>(98%) | 1/945<br>(0%)  | 1629 |
|   |              | 63715225 | GGAATGC | CACGTG | CITGTG | CACATC | AATAAATA | GGATCCT | 928/945<br>(98%) | 1/945<br>(0%)  | 1624 |
|   |              | 22443836 | GGAATGC | CACGTG | CITGTG | CACATC | AATAAATA | GGATCCT | 920/945<br>(97%) | 2/945<br>(0%)  | 1584 |
|   |              | 36863376 | GGAATGC | CAIGTG | CITGTG | CACATC | AATAAATA | GGATCCT | 917/945<br>(97%) | 9/945<br>(0%)  | 1577 |
|   |              | 15965693 | GGCATGC | CACGTG | CITGTG | CACATC | AATAAATA | GGATCCT | 907/943<br>(96%) | 2/943<br>(0%)  | 1532 |
|   |              | 59505425 | GGCATGC | CACGTG | CITGTG | CACATC | AATAAATA | GGATCCT | 903/946<br>(95%) | 10/946<br>(1%) | 1508 |
| 5 | NT_023133.12 | 895242   | GGAATGC | CACGTG | CITGTG | CACATC | AATAAATA | GGATCCT | 929/945<br>(98%) | 1/945<br>(0%)  | 1629 |
|   |              | 903454   | GGAATGC | CACGTG | CITGTG | CACATC | AATAAATA | GGATCCT | 929/945<br>(98%) | 1/945<br>(0%)  | 1629 |
|   |              | 23751517 | GGCATGC | CAIGTG | CITGTG | CACATC | AATAAATG | GGATCCT | 920/945<br>(97%) | 1/945<br>(0%)  | 1588 |
|   |              | 14234396 | GGAATGT | CACGTG | CITGTG | CACATC | AATAAATA | GGATCCT | 917/945<br>(97%) | 9/945<br>(0%)  | 1577 |
|   |              | 25063855 | GGCATGC | CACGTG | CITGTG | CACATC | AATAAATA | GGATCCT | 898/945<br>(95%) | 5/945<br>(0%)  | 1483 |

Sequences identical to the corresponding positions of the HERV-K LTR (HML-2.HOM) are in black. Altered sequences that seemed to preserve the proposed functions are in blue. Nucleotide substitutions expected to disrupt the function are in red.

**Table W2.** Rhesus Monkey (*Macaca mulatta*) LTRs with Less Than 80% Sequence Identity to the Human-type HERV-K LTR.

|                                     |          | Inr460  | MITF-3  | MITF-2 | MITF-1 | 793TATA  | Inr826                                      |         |                 |             |              |
|-------------------------------------|----------|---------|---------|--------|--------|----------|---------------------------------------------|---------|-----------------|-------------|--------------|
| Template HKLTR-1                    | #1       | GGAATGC | CACATG  | CITGTG | CACATC | AATAAATA | Insertion of Inr consensus, PyPyAN(T/A)PyPy | GGATCCT |                 |             |              |
| <i>M. mulatta</i> genomic reference | Position |         |         |        |        |          |                                             |         | Identity (≥80%) | Gaps        | Score (bits) |
| AC210649.4                          | 68871    | G—GC    | CACATG  | CCTATT | CACATT | AATAAATA | CCATTGC                                     | GGGTCCT | 800/957 (84%)   | 30/957 (3%) | 996          |
| AC206102.3                          | 78780    | GG—TCT  | CACAT I | CCTATT | CACATC | AATAAATA |                                             | GGGTCCT | 749/922 (82%)   | 27/922 (2%) | 836          |
| AC213330.3                          | 173369   | GG—TCT  | CACAT I | CCTATT | CACATC | AATAAATA |                                             | GGGTCCT | 749/922 (82%)   | 27/922 (2%) | 836          |
| AC191812.4                          | 161342   | AGAAGGC | CACATG  | CCTATT | CACTTC | AATAAATA |                                             | GGGTCCT | 774/967 (81%)   | 47/967 (4%) | 836          |
| AC197502.3                          | 156174   | G—GC    | IACATG  |        | TTCATC | AACAATA  |                                             | CCATCCT | 775/962 (81%)   | 50/962 (5%) | 834          |
|                                     | 165784   | G—TC    | CACATG  | CCTATT | CACTTC | AGCAAATA |                                             | AGGTCCT | 756/950 (80%)   | 46/950 (4%) | 821          |
| AC218138.3                          | 19882    | AGAAGGC | CACATG  | CTATTG | CACTTC | AATAAATA |                                             | CGAGTCC | 776/968 (81%)   | 35/968 (3%) | 827          |
| AC209790.2                          | 102901   | AGAAGGC | CCTATT  | CCTATT | CACTTC | AATAAATA |                                             | CGAGTCC | 776/968 (81%)   | 35/968 (3%) | 827          |
| AC201622.7                          | 131721   | G—GC    | CACATG  | CCTATT | CACATC | AATAAATA |                                             |         | 687/831 (83%)   | 34/831 (4%) | 827          |
| AC148674.1                          | 31678    | GG—CC   | CACATG  | CCTATA | CACATC | AATAAATA |                                             | GGGTCCT | 781/980 (80%)   | 45/980 (4%) | 821          |
| AC194579.7                          | 213314   | GG—CGGC | CACGT I | CCTATG | CACATC | AATAAATA | TCAGTGC                                     | AGGTCCT | 782/980 (80%)   | 48/980 (4%) | 820          |
|                                     | 195164   | GG—CGGC | CACGT I | CCTATG | CACATC | AATAAATA | CCAGTGC                                     | GG—TCCT | 780/981 (80%)   | 53/981 (5%) | 807          |
| AC191828.3                          | 148275   | GG—CGGC | CACGT I | CCTATG | CACATC | AATAAATA | TCAGTGC                                     | AGGTCCT | 782/980 (80%)   | 48/980 (4%) | 820          |
| AB128049.1                          | 2710708  | AGAAGGC | CATATG  | CCTATT | CACTTC | AATAAATA |                                             | GGGTCCT | 771/970 (80%)   | 59/970 (6%) | 820          |
|                                     | 3070098  | AGAAGGC | CATATG  | CCTATT | CACTTC | AATAAATA |                                             | GGGTCCT | 770/967 (80%)   | 55/967 (5%) | 816          |
|                                     | 3159304  | AGAAGGC | CATATG  | CCTATT | CACTTC | AATAAATA | CCAGCTT                                     | GGGTCCT | 766/967 (80%)   | 54/967 (5%) | 801          |
|                                     | 2817651  | AGAAGGC | CATATG  | CCTATT | CACTTC | AATAAATA | CCAGTGC                                     | GGGTCCT | 766/967 (80%)   | 57/967 (5%) | 794          |
| AC199608.6                          | 115869   | AGAAGGC | CATATG  | CCTATT | CACTTC | AATACATA | CCAGTGC                                     | GGGCCCT | 769/967 (80%)   | 50/967 (5%) | 816          |
| AC210647.2                          | 87803    | AGAAGGC | CATATG  | CCTATT | CACTTC | AATAAATA |                                             | GGGTCCT | 770/969 (80%)   | 60/969 (6%) | 814          |
| AC148684.1                          | 87804    | GGAATGT | CATATG  | CCTATT | CACTTC | AATAAATA |                                             | GGGTCCT | 770/969 (80%)   | 60/969 (6%) | 814          |
| AC148680.1                          | 161314   | AGAAGGC | CATATG  | CCTATT | CACTTC | AATAAATA |                                             | GGGTCCT | 770/969 (80%)   | 60/969 (6%) | 814          |
| AC193058.7                          | 104908   | G—GC    | CACATC  | CCTATT | CACATC | AATAAATA | CTAGTGC                                     | GGGTC—A | 778/981 (80%)   | 62/981 (6%) | 801          |
| AC148690.1                          | 2395     | GGAATAT | CATATG  | CCTATT | CACTTC | AATAAATA | CCAGCTT                                     | GGGTCCT | 766/967 (80%)   | 54/967 (5%) | 801          |
|                                     | 94162    | AGAAGGC | CATATG  | CCTATT | CACTTC | AATAAATA | CCAGCTT                                     | GGGTCCT | 766/967 (80%)   | 54/967 (5%) | 801          |
| AC148682.1                          | 106447   | AGAAGGC | CATATG  | CCTATT | CACTTC | AATAAATA | CCAGCTT                                     | GGGTCCT | 766/967 (80%)   | 54/967 (5%) | 801          |
|                                     | 198215   | AGAAGGC | CATATG  | CCTATT | CACTTC | AATAAATA | CCAGCTT                                     | GGGTCCT | 766/967 (80%)   | 54/967 (5%) | 801          |
| AC225834.3                          | 157305   | AGAAGGC | CATATG  | CCTATT | CACTTC | AATAAATA |                                             | GGGTCCT | 765/965 (80%)   | 51/965 (5%) | 800          |
| AC193521.7                          | 79951    | GGCTTCT | CICATG  | CCTATA | CACATC | AGTAAATA | CCAGTCC                                     | GGGTCCT | 775/977 (80%)   | 46/977 (4%) | 798          |
| AC214376.3                          | 140057   | AGAAGGC | CACATG  | CCTATT | CACTTC | AATAAATA |                                             | GGGTCCT | 755/951 (80%)   | 56/951 (5%) | 792          |
| AC210118.6                          | 102633   | AGAAGGC | CATATG  | CTATTA | CACTTC | AATAAATA |                                             | GGGTCCT | 765/966 (80%)   | 49/966 (5%) | 791          |
| AC148703.1                          | 4548     | AGAAGGC | CATATG  | CCTATT | CACTTC | AATAAATC |                                             | GGGTCCT | 765/967 (80%)   | 53/967 (5%) | 791          |
| AC148694.1                          | 141943   | AGAAGGC | CATATG  | CCTATT | CACTTC | AATAAATC |                                             | GGGTCCT | 765/967 (80%)   | 53/967 (5%) | 791          |
| AC191957.7                          | 14747    | AGAAGGC | CATATG  | CCTATT | CACTTC | AATAAATA |                                             | GGGTCCT | 733/927 (80%)   | 49/927 (5%) | 756          |

Sequences identical to the corresponding positions of the HERV-K LTR (HML-2.HOM) are in black. Altered sequences that seemed to preserve the proposed functions are in blue. Nucleotide substitutions expected to disrupt the function are in red.
